# Supplementary material
Source: ML conference proceedings conference paper supplement (https://www.ecva.net/papers/eccv_2020/papers_ECCV/html/123680137_ECCV_2020_paper.php)
Supplement: Supplementary file 1 [file 123680137-supp.pdf]

# Supplementary Material: Kinematic 3D Object Detection in Monocular Video

Garrick Brazil<sup>1</sup>, Gerard Pons-Moll<sup>2</sup>, Xiaoming Liu<sup>1</sup>, and Bernt Schiele<sup>2</sup>

<sup>1</sup> Michigan State University, Computer Science & Engineering

<sup>2</sup> Max Planck Institute for Informatics, Saarland Informatics Campus

<sup>1</sup> {brazilga, liuxm}@msu.edu, <sup>2</sup> {gpons, schiele}@mpi-inf.mpg.de

|             | AP <sub>3D</sub> (IoU $\geq$ [0.7/0.5]) |             |            | AP <sub>BEV</sub> (IoU $\geq$ [0.7/0.5]) |             |             |
|-------------|-----------------------------------------|-------------|------------|------------------------------------------|-------------|-------------|
|             | Easy                                    | Mod         | Hard       | Easy                                     | Mod         | Hard        |
| 2 bins      | 12.83/46.46                             | 9.47/33.78  | 7.93/26.85 | 19.17/52.06                              | 14.72/37.54 | 11.38/31.16 |
| 4 bins      | 12.65/44.01                             | 10.02/33.27 | 7.87/26.27 | 19.09/49.86                              | 14.55/37.90 | 11.14/30.44 |
| 10 bins     | 14.27/49.71                             | 10.74/36.12 | 8.29/28.62 | 21.12/54.70                              | 15.37/39.72 | 11.60/31.75 |
| Our decomp. | 16.66/51.47                             | 12.10/38.58 | 9.40/30.98 | 23.15/56.48                              | 17.43/42.53 | 13.48/34.37 |

**Table 1. Orientation.** We compare our orientation decomposition to bin-based orientation following the high-level concepts within [3–5, 7], using AP<sub>3D</sub> and AP<sub>BEV</sub>. We evaluate our performances on the KITTI validation set [2] using IoU  $\geq$  0.7/0.5.

## 1 Orientation Ablations

We provide detailed experiments on 3D object detection and Bird’s Eye View tasks to compare our orientation decomposition performance with bin-based approaches such as [3–5, 7] within Tab. 1. Recall that bin-based orientation first classifies the best bin for orientation then predicts an offset with respect to the bin. In contrast, our method disentangles the bin classification into a distinct explainable objectives such as an axis classification and a heading classification. For such experiments we change our formulation to use bins of [2, 4, 10], where 4 bins has a similar representational power as two binary classifications  $[\theta_a, \theta_h]$ . The bins are spread uniformly from  $[0, 2\pi]$  and an offset is predicted afterwards. We use the settings in Sec. 3.4 in main paper. We emphasize that our method outperforms the bin-based approaches between  $\approx 1.36 - 2.63\%$  on AP<sub>3D</sub> and  $\approx 2.06 - 2.71\%$  on AP<sub>BEV</sub> using the standard moderate setting and IoU  $\geq$  0.7.

## 2 Kalman Forecasting

Since our method uses ego-motion and a 3D Kalman filter to aggregate temporal information, the approach can be modified to act as a box forecaster. Although our method was not strictly designed for the tracking and forecasting task, we evaluate the 3D object detection and Bird’s Eye View performance after forecasting  $n_f = [1, 2, 3, 4]$  frames into the future. We assume a static ego-motion

for unknown frames and otherwise use the Kalman equations described in the main paper Sec. 3.3 to forecast the tracked boxes.

For all forecasting experiments we process 4 temporally adjacent frames before forecasting. Since KITTI only provides a current frame and 3 proceeding frames, we carefully map images back to the raw dataset in order to forecast. For instance, when  $n_f = 2$  we infer using frames  $[-5, -4, -3, -2]$  then forecast ego-motion and Kalman  $n_f$  times. We then evaluate with respect to frame 0 which is the standard timestamp KITTI provides images and 3D labels for. We provide detailed performances on  $AP_{3D}$  in Tab. 2 and  $AP_{BEV}$  in Tab. 3. We find that the forecasting performance degrades through time but performs reasonably 1 – 2 frames ahead, being competitive in magnitude to state-of-the-art methods on the KITTI test dataset as reported in Tab. 1 of the main paper. For instance, forecasting 1 and 2 frames results in 10.64% and 5.10%  $AP_{3D}$  respectively, which are competitive to methods [1, 3–8] on the test dataset.

|                          | $AP_{3D}$ (IoU $\geq [0.7/0.5/0.3]$ ) |                       |                       |
|--------------------------|---------------------------------------|-----------------------|-----------------------|
|                          | Easy                                  | Mod                   | Hard                  |
| Forecast $\rightarrow 4$ | 1.16 / 18.47 / 47.26                  | 0.84 / 11.21 / 29.22  | 0.62 / 8.97 / 23.40   |
| Forecast $\rightarrow 3$ | 3.72 / 28.97 / 58.46                  | 2.32 / 18.05 / 37.82  | 1.75 / 13.88 / 29.80  |
| Forecast $\rightarrow 2$ | 7.84 / 39.40 / 68.87                  | 5.10 / 25.48 / 48.30  | 4.14 / 20.20 / 37.84  |
| Forecast $\rightarrow 1$ | 16.09 / 49.66 / 75.88                 | 10.64 / 34.18 / 55.26 | 8.14 / 26.62 / 44.01  |
| No Forecast              | 19.76 / 55.44 / 79.81                 | 14.10 / 39.47 / 60.57 | 10.47 / 31.26 / 48.95 |

**Table 2. Forecasting - 3D Object Detection.** We evaluate our forecasting performance on  $AP_{3D}$  within the KITTI validation [2] set and using IoU  $\geq 0.7/0.5/0.3$ .

|                          | $AP_{BEV}$ (IoU $\geq [0.7/0.5/0.3]$ ) |                       |                       |
|--------------------------|----------------------------------------|-----------------------|-----------------------|
|                          | Easy                                   | Mod                   | Hard                  |
| Forecast $\rightarrow 4$ | 5.48 / 29.40 / 54.52                   | 3.54 / 18.13 / 36.13  | 2.90 / 14.71 / 28.49  |
| Forecast $\rightarrow 3$ | 11.03 / 39.08 / 64.87                  | 6.89 / 24.01 / 43.52  | 5.67 / 18.85 / 34.91  |
| Forecast $\rightarrow 2$ | 17.02 / 47.07 / 72.33                  | 10.76 / 31.62 / 51.67 | 8.37 / 25.47 / 40.79  |
| Forecast $\rightarrow 1$ | 23.58 / 55.99 / 77.48                  | 15.79 / 39.33 / 58.05 | 12.54 / 31.22 / 46.59 |
| No Forecast              | 27.83 / 61.79 / 81.20                  | 19.72 / 44.68 / 63.44 | 15.10 / 34.56 / 49.84 |

**Table 3. Forecasting - Bird’s Eye View.** We evaluate our forecasting performance on  $AP_{BEV}$  within the KITTI validation [2] set and using IoU  $\geq 0.7/0.5/0.3$ .

### 3 Qualitative Video

We further provide a qualitative demonstration video at <http://cvlab.cse.msu.edu/project-kinematic.html>. The video demonstrates our framework’s ability to determine a full scene understanding including 3D object cuboids, per-object velocity and ego-motion. We compare to a related monocular work of M3D-RPN [1], plot ground truths, image view, Bird’s Eye View, and the track history.

## References

1. Brazil, G., Liu, X.: M3D-RPN: Monocular 3D region proposal network for object detection. In: ICCV. IEEE (2019) 2
2. Chen, X., Kundu, K., Zhu, Y., Berneshawi, A.G., Ma, H., Fidler, S., Urtasun, R.: 3D object proposals for accurate object class detection. In: NeurIPS (2015) 1, 2
3. Ku, J., Pon, A.D., Waslander, S.L.: Monocular 3D object detection leveraging accurate proposals and shape reconstruction. In: CVPR. IEEE (2019) 1, 2
4. Li, B., Ouyang, W., Sheng, L., Zeng, X., Wang, X.: GS3D: An efficient 3D object detection framework for autonomous driving. In: CVPR. IEEE (2019) 1, 2
5. Liu, L., Lu, J., Xu, C., Tian, Q., Zhou, J.: Deep fitting degree scoring network for monocular 3D object detection. In: CVPR. IEEE (2019) 1, 2
6. Ma, X., Wang, Z., Li, H., Zhang, P., Ouyang, W., Fan, X.: Accurate monocular 3D object detection via color-embedded 3d reconstruction for autonomous driving. In: ICCV. IEEE (2019) 2
7. Manhardt, F., Kehl, W., Gaidon, A.: ROI-10D: Monocular lifting of 2D detection to 6D pose and metric shape. In: CVPR. IEEE (2019) 1, 2
8. Simonelli, A., Bulò, S.R., Porzi, L., López-Antequera, M., Kotschieder, P.: Disentangling monocular 3D object detection. In: ICCV. IEEE (2019) 2
